# Supplementary material
Source: Elsevier journal article supplement (https://www.sciencedirect.com/science/article/pii/S0300289621003860)

T2 BIOMARKERS AS PREDICTORS OF EXACERBATIONS OF CHRONIC OBSTRUCTIVE PULMONARY DISEASE

SUPPLEMENTARY FIGURES

**S Figure 1-** Kaplan-Meier analysis of time (days) to moderate or severe COPD exacerbations and Hazard Ratios (HR) in ICs treated population (right) and ICs-naïve population (left), after adjusting for age, gender, smoking, and stratified by high T2 biomarkers. See text for further explanation.

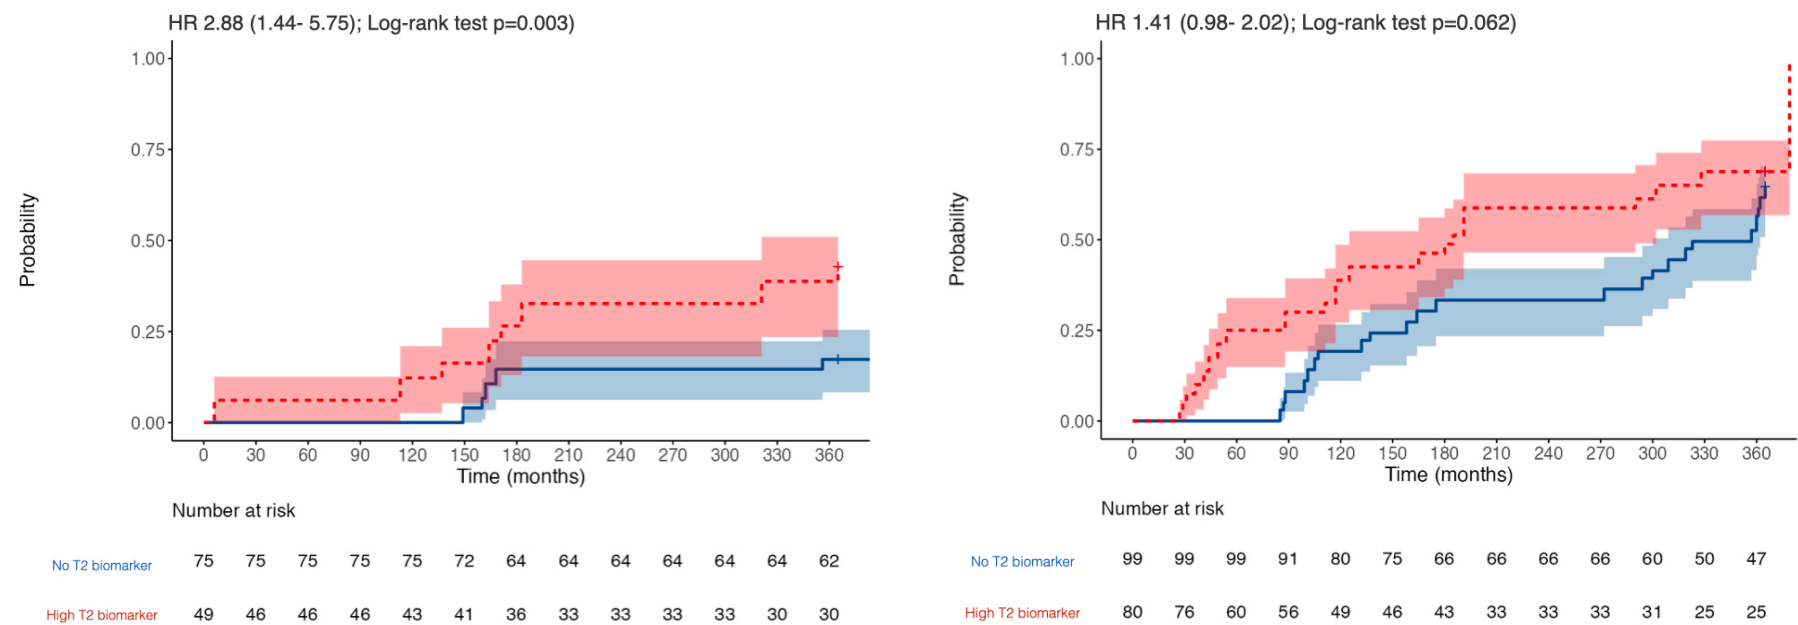

**S Figure 2-** Receiver operator curves (ROC) and predictive capacity analysis for T2 biomarkers detecting at least one moderate or severe COPD exacerbation stratified by ICS use (left) and smoking history (right)

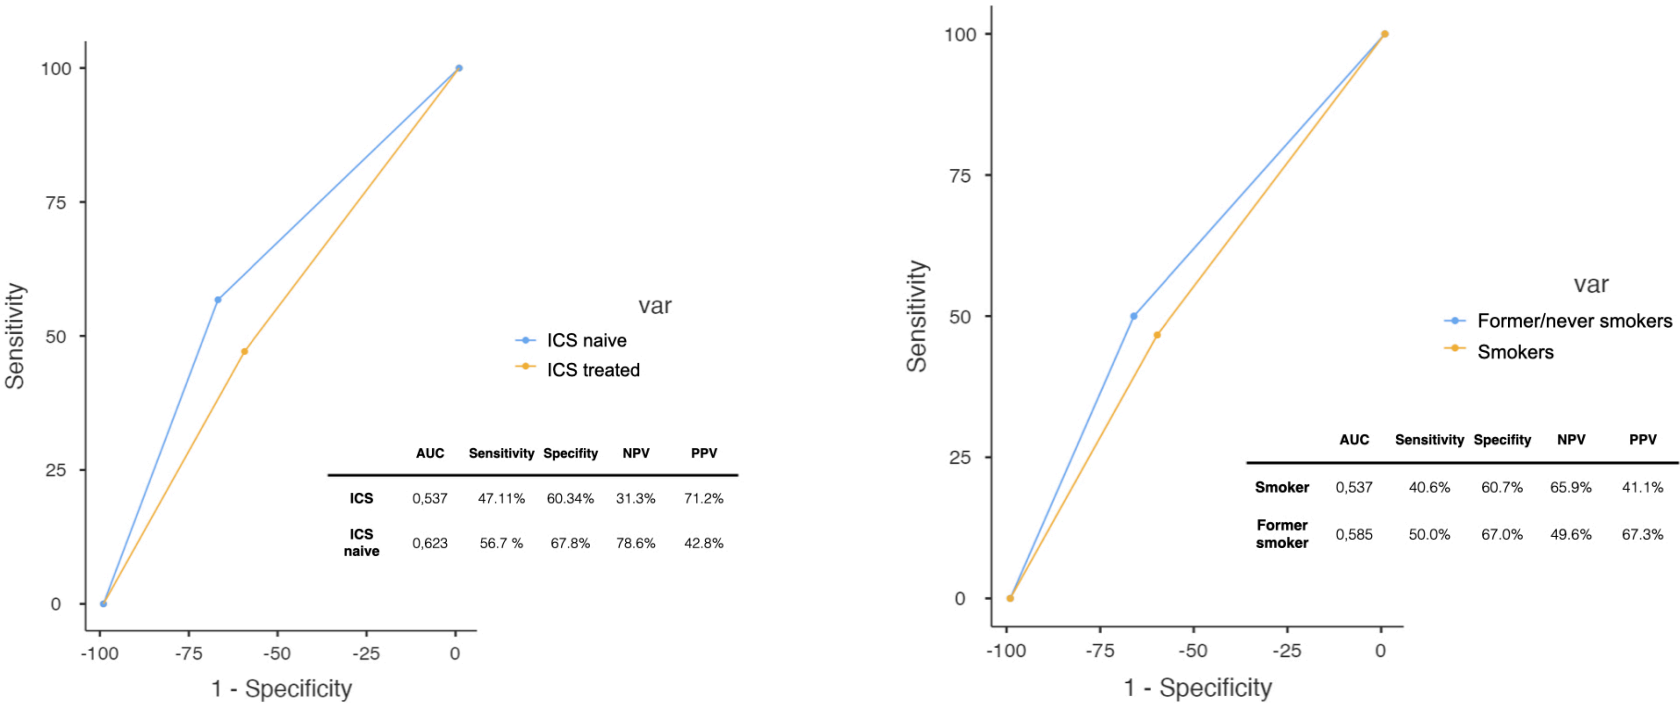

Supplement: mmc1 [file S0300289621003860:mmc1.pdf]
